# Supplementary material for: Tobacco control challenges in East Asia: proposals for change in the world's largest epidemic region
Source: HighWire-hosted journal article supplement (doi:10.1136/tobaccocontrol-2012-050852), 2013-04-17
Supplement: tobaccocontrol-2012-050852supp_table.pdf [file tobaccocontrol-2012-050852supp_table.pdf]

Appendix. Collected data items and sources for tobacco control in Japan, China, and South Korea.

| Category*                                               | Data                            | Source                                                                                                                                                                                                     | Survey details                                                                                                                                                                                                                                                                                                      | Ref.                                                                                                                                                                                                                                                                                                          |        |
|---------------------------------------------------------|---------------------------------|------------------------------------------------------------------------------------------------------------------------------------------------------------------------------------------------------------|---------------------------------------------------------------------------------------------------------------------------------------------------------------------------------------------------------------------------------------------------------------------------------------------------------------------|---------------------------------------------------------------------------------------------------------------------------------------------------------------------------------------------------------------------------------------------------------------------------------------------------------------|--------|
| Monitoring                                              | Adult smoking                   | J: National Health and Nutrition Survey in Japan (2010 and 2009 data)                                                                                                                                      | Target population: whole nation (1 year old or older); Sampling method: two-stage cluster sampling of households; Sample size: 3,684 households from 300 sampling units (7,881 individuals) <sup>†</sup> ; Survey procedure: self-administered questionnaire.                                                       | 15, 16, 18                                                                                                                                                                                                                                                                                                    |        |
|                                                         |                                 | C: Global Adult Tobacco Survey (2010 data)                                                                                                                                                                 | Target population: whole nation (15 years old or older); Sampling method: multistage geographically clustered sampling of households; Sample size: 13,562 households; Survey procedure: interview by trained personnel.                                                                                             | 13, 17                                                                                                                                                                                                                                                                                                        |        |
|                                                         |                                 | Report on Chronic Disease Risk Factor Surveillance in China (2007 data)                                                                                                                                    | Target population: whole nation (15-69 year old); Sampling method: multistage cluster sampling of households; Sample size: 50,717 households from 160 sampling units (50,717 individuals); Survey procedure: interview by trained personnel.                                                                        | 14                                                                                                                                                                                                                                                                                                            |        |
|                                                         | Youth smoking                   | K: Korean National Health & Nutrition Examination Survey (2010 data)                                                                                                                                       | Target population: whole nation (1 year old or older); Sampling method: two-stage cluster sampling of households; Sample size: 3,840 households from 192 sampling units (3,840 individuals); Survey procedure: interview by trained personnel.                                                                      | 14                                                                                                                                                                                                                                                                                                            |        |
|                                                         |                                 | J: Nationwide Survey on Adolescent Smoking and Drinking Behavior in Japan (2008 data)                                                                                                                      | Target population: whole nation (7th-12th grades); Sampling method: probability proportionate sampling of schools; Sample size: 95,680 individuals from 130 junior high schools and 110 high schools; Survey procedure: self-administered questionnaire.                                                            | 19                                                                                                                                                                                                                                                                                                            |        |
|                                                         |                                 | C: Survey Report on the Health and Risk Behavior among Chinese Youth (2005 data)                                                                                                                           | Target population: selected cities in 18 provinces (11-23 years old); Sampling method: multistage cluster sampling; Sample size: 213,253 individuals; Survey procedure: interview by trained personnel.                                                                                                             | 20                                                                                                                                                                                                                                                                                                            |        |
|                                                         | Age at initiation of smoking    | K: Youth Health Risk Behavior Web-based Survey (2010 data)                                                                                                                                                 | Target population: whole nation (7th-12th grades); Sampling method: two-stage cluster sampling; Sample size: 73,238 individuals from 400 middle schools and 400 high schools; Survey procedure: self-administered questionnaire.                                                                                    | 21                                                                                                                                                                                                                                                                                                            |        |
|                                                         |                                 | J: National Health and Nutrition Survey in Japan (2003 data)                                                                                                                                               | Target population: whole nation (1 year old or older); Sampling method: two-stage cluster sampling of households; Sample size: 4,160 households from 300 sampling units (9,794 individuals); Survey procedure: self-administered questionnaire.                                                                     | 12, 16                                                                                                                                                                                                                                                                                                        |        |
|                                                         |                                 | C: Report on Chronic Disease Risk Factor Surveillance in China (2007 data)                                                                                                                                 | Target population: whole nation (15-69 year old); Sampling method: multistage cluster sampling of households; Sample size: 50,717 households from 160 sampling units (50,717 individuals); Survey procedure: interview by trained personnel.                                                                        | 17                                                                                                                                                                                                                                                                                                            |        |
|                                                         | Protect                         | Passive smoking among adults                                                                                                                                                                               | K: Korean National Health & Nutrition Examination Survey (2010 data)                                                                                                                                                                                                                                                | Target population: whole nation (1 year old or older); Sampling method: two-stage cluster sampling of households; Sample size: 3,840 households from 192 sampling units (3,840 individuals); Survey procedure: interview by trained personnel.                                                                | 14     |
|                                                         |                                 |                                                                                                                                                                                                            | National Health and Nutrition Survey in Japan (2008 data, for non-smokers)                                                                                                                                                                                                                                          | Target population: whole nation (1 year old or older); Sampling method: two-stage cluster sampling of households; Sample size: 3,838 households from 300 sampling units (8,557 individuals); Survey procedure: self-administered questionnaire.                                                               | 14     |
|                                                         |                                 |                                                                                                                                                                                                            | J: National Health and Nutrition Survey in Japan (2010 data)                                                                                                                                                                                                                                                        | Target population: whole nation (1 year old or older); Sampling method: two-stage cluster sampling of households; Sample size: 3,684 households from 300 sampling units (7,881 individuals); Survey procedure: self-administered questionnaire.                                                               | 18, 22 |
| Passive smoking among youth                             |                                 | C: Global Adult Tobacco Survey (2010 data)                                                                                                                                                                 | Target population: whole nation (15 years old or older); Sampling method: multistage geographically clustered sampling of households; Sample size: 13,562 households; Survey procedure: interview by trained personnel.                                                                                             | 13                                                                                                                                                                                                                                                                                                            |        |
|                                                         |                                 | K: Korean National Health & Nutrition Examination Survey (2010 data)                                                                                                                                       | Target population: whole nation (1 year old or older); Sampling method: two-stage cluster sampling of households; Sample size: 3,840 households from 192 sampling units (3,840 individuals); Survey procedure: interview by trained personnel.                                                                      | 14                                                                                                                                                                                                                                                                                                            |        |
|                                                         |                                 | J: National Health and Nutrition Survey in Japan (2008 data)                                                                                                                                               | Target population: whole nation (1 year old or older); Sampling method: two-stage cluster sampling of households; Sample size: 3,838 households from 300 sampling units (8,557 individuals including 386 individuals aged 15-19 years); Survey procedure: self-administered questionnaire.                          | 22                                                                                                                                                                                                                                                                                                            |        |
| Support for smoking ban in workplaces and public places |                                 | C: Tobacco Control 2006: 15 (Supple II): ii4-19 (Global Youth Tobacco Survey)                                                                                                                              | Target population: 7 cities (13-15 years old); Sampling method: multistage sampling of schools selected proportional to enrollment size, and classrooms chosen randomly within selected schools; Sample size: 2,362 individuals on average (range: 1,759-3,328); Survey procedure: self-administered questionnaire. | 25                                                                                                                                                                                                                                                                                                            |        |
|                                                         |                                 | K: Youth Health Risk Behavior Web-based Survey (2010 data)                                                                                                                                                 | Target population: whole nation (7th-12th grades); Sampling method: two-stage cluster sampling; Sample size: 73,238 individuals from 400 middle schools and 400 high schools; Survey procedure: self-administered questionnaire.                                                                                    | 21                                                                                                                                                                                                                                                                                                            |        |
|                                                         |                                 | J: Special Survey on Industrial Safety and Health Survey on State of Employees' Health (2007) (For workplace)                                                                                              | Target population: whole nation (workers); Sampling method: Sampling of workplaces with 10 employees or more from the workplace list for the Establishment and Enterprise Census of Japan ; Sample size: 9,634 workplaces (11,440 workers); Survey procedure: self-administered questionnaire.                      | 24                                                                                                                                                                                                                                                                                                            |        |
| Offer                                                   |                                 | Smoking cessation (planning to quit, quit attempt rate, and quit attempt without assistance)                                                                                                               | C: Tobacco Control 2010: 19 (Supple II): i40-46 (International Tobacco Control China Survey)                                                                                                                                                                                                                        | Target population: 6 cities (13-15 years old); Sampling method: multistage sampling of residential areas proportional to population size, and 300 households randomly selected in each residential place; Sample size: 4,815 smokers and 1,270 non-smokers; Survey procedure: interview by trained personnel. | 23     |
|                                                         |                                 |                                                                                                                                                                                                            | K: (N/A)                                                                                                                                                                                                                                                                                                            |                                                                                                                                                                                                                                                                                                               |        |
|                                                         |                                 |                                                                                                                                                                                                            | J: Nationwide Survey on Adult Smoking Behavior and Passive Smoking Exposure (2010 data)                                                                                                                                                                                                                             | Target population: whole nation (20 years old or older); Sampling method: random sampling of residential areas, and random sampling of residents based on resident registration; Sample size: 1,794 individuals; Survey procedure: interview by trained personnel.                                            | 26     |
| Availability of pharmacotherapy                         | Availability of pharmacotherapy | C: Global Adult Tobacco Survey (2010 data)                                                                                                                                                                 | Target population: whole nation (15 years old or older); Sampling method: multistage geographically clustered sampling of households; Sample size: 13,562 households; Survey procedure: interview by trained personnel.                                                                                             | 13                                                                                                                                                                                                                                                                                                            |        |
|                                                         |                                 | K: Korean National Health & Nutrition Examination Survey (2010 data)                                                                                                                                       | Target population: whole nation (1 year old or older); Sampling method: two-stage cluster sampling of households; Sample size: 3,840 households from 192 sampling units (3,840 individuals); Survey procedure: interview by trained personnel.                                                                      | 14                                                                                                                                                                                                                                                                                                            |        |
|                                                         |                                 | J: Guidelines for Smoking Cessation Treatment, 4th Edition (2010)                                                                                                                                          |                                                                                                                                                                                                                                                                                                                     | 32                                                                                                                                                                                                                                                                                                            |        |
|                                                         |                                 | C: Manual for Brief Smoking Cessation Intervention (2010)                                                                                                                                                  |                                                                                                                                                                                                                                                                                                                     | 33                                                                                                                                                                                                                                                                                                            |        |
| Warning                                                 | Health warning on label         | State Food and Drug Administration, China                                                                                                                                                                  |                                                                                                                                                                                                                                                                                                                     | 35                                                                                                                                                                                                                                                                                                            |        |
|                                                         |                                 | K: Guidelines for Health Promotion Program in Public Health Center : Smoking Cessation Service, Ministry of Health & Welfare, South Korea (2011)                                                           |                                                                                                                                                                                                                                                                                                                     | 34                                                                                                                                                                                                                                                                                                            |        |
|                                                         |                                 | Guidelines for Professionals on Medical Treatment of Smoking Cessation, Ministry of Health & Welfare (2005)                                                                                                |                                                                                                                                                                                                                                                                                                                     | 34                                                                                                                                                                                                                                                                                                            |        |
| Enforcement                                             | Regulation of tobacco promotion | J: Ordinance for Enforcement of the Tobacco Industry Law (Nov. 13, 2003)                                                                                                                                   |                                                                                                                                                                                                                                                                                                                     | 36                                                                                                                                                                                                                                                                                                            |        |
|                                                         |                                 | C: China Tobacco Control Report (2009)                                                                                                                                                                     |                                                                                                                                                                                                                                                                                                                     | 38                                                                                                                                                                                                                                                                                                            |        |
|                                                         |                                 | K: Law for the Promotion of Nation's Health (Sept. 1, 1995)                                                                                                                                                |                                                                                                                                                                                                                                                                                                                     | 37                                                                                                                                                                                                                                                                                                            |        |
| Raise                                                   | Average price and tax           | (Literature search)                                                                                                                                                                                        |                                                                                                                                                                                                                                                                                                                     |                                                                                                                                                                                                                                                                                                               |        |
|                                                         |                                 | J: Ministry of Finance, Japan                                                                                                                                                                              |                                                                                                                                                                                                                                                                                                                     |                                                                                                                                                                                                                                                                                                               |        |
| Trends in cigarette sales                               | Trends in cigarette sales       | C: Potential Effects of Tobacco Taxation, the Chinese Association of Tobacco Control (2008)                                                                                                                |                                                                                                                                                                                                                                                                                                                     | 27                                                                                                                                                                                                                                                                                                            |        |
|                                                         |                                 | K: Ministry of Health & Welfare, South Korea                                                                                                                                                               |                                                                                                                                                                                                                                                                                                                     |                                                                                                                                                                                                                                                                                                               |        |
|                                                         |                                 | J: Japan Health Promotion & Fitness Foundation (1920-2007); Annual Report of Japan Tobacco Inc. (2008-10)                                                                                                  |                                                                                                                                                                                                                                                                                                                     | 28, 31                                                                                                                                                                                                                                                                                                        |        |
|                                                         |                                 | C: China Tobacco Development Report, the Institute of Economics, National Agency for Tobacco Monopoly (2002); Cigarette Business Risk Assessment Report, National Development and Reform Commission (2008) |                                                                                                                                                                                                                                                                                                                     | 29, 30                                                                                                                                                                                                                                                                                                        |        |
|                                                         |                                 | K: National Statistical Office, South Korea                                                                                                                                                                |                                                                                                                                                                                                                                                                                                                     |                                                                                                                                                                                                                                                                                                               |        |

\* Categorized according to the MPOWER package.<sup>5</sup>

† For 2009 data, 3,788 households from 300 sampling units (9,803 individuals).

J: Japan, C: China, K: South Korea, N/A: not available, Ref.: reference number.
